# Supplementary material for: Impact on place of death in cancer patients: a causal exploration in southern Switzerland
Source: Springer Nature journal article supplement (doi:10.1186/s12904-020-00664-4), 2020-10-15
Supplement: MOESM1 [file 18487942]

Additional file 1. Table 2: Variables and states in the causal probabilistic model

| Table 2. Elicited variables and states of variables of the causal probabilistic model |                                                                                                   |
|---------------------------------------------------------------------------------------|---------------------------------------------------------------------------------------------------|
| <u>Variables</u>                                                                      | <u>States of variables</u>                                                                        |
| Core variable: Place of death                                                         | Outcome: Home; hospital; nursing home                                                             |
| <i>Individual-related variables</i>                                                   | <i>Individual-related states of variables</i>                                                     |
| Days spent in a hospital 60 days prior to assessment                                  | 0-20; 21-40; 41-60                                                                                |
| Age (years)                                                                           | 20-40; 41-65; 66-80; >80                                                                          |
| Karnofsky Performance Status (KPS)                                                    | 0-40; 45-65; 70-100                                                                               |
| Degree of dependence                                                                  | Almost independent; needs routine help; needs continuous help                                     |
| Patient's cognition                                                                   | Normal cognition; mild impairment; impairment                                                     |
| Patient's residence                                                                   | Home; nursing home                                                                                |
| Patient's awareness of dying                                                          | Open; closed                                                                                      |
| Patient's preference for place of care                                                | Home; nursing home; hospital                                                                      |
| <i>Illness-related variables</i>                                                      | <i>Illness-related states of variables</i>                                                        |
| Symptom burden                                                                        | None-low; medium-high                                                                             |
| Comorbidity                                                                           | Non or not severe; severe                                                                         |
| Cancer treatment resources                                                            | Available; not available                                                                          |
| Cancer treatment                                                                      | Ongoing active treatment; treatment discontinued                                                  |
| <i>Family-related variables</i>                                                       | <i>Family-related states of variables</i>                                                         |
| Family's awareness of dying                                                           | Open; closed                                                                                      |
| Family's emotional relationship                                                       | Somewhat solid; somewhat conflictual                                                              |
| Family's availability for home care                                                   | At least one person available; nobody available                                                   |
| Family system's conditions                                                            | Suitable for home care; unsuitable for home care                                                  |
| Family's preference for place of care                                                 | Home; nursing home; hospital                                                                      |
| Family's time resources                                                               | Poor; limited; unlimited                                                                          |
| Geographic distance of the family caregiver                                           | 0-5 km; 5-50 km; >50 km                                                                           |
| Area of residence                                                                     | Rural; urban                                                                                      |
| Family's economic resources for home care                                             | Poor; high                                                                                        |
| Income benefit support                                                                | No; yes                                                                                           |
| <i>Care network-related variables</i>                                                 | <i>Care network-related states of variables</i>                                                   |
| Oncologist: Communication of poor prognosis                                           | Little information about the end of life given; partial information given; full information given |
| General practitioner                                                                  | Home visits; no home visits                                                                       |
| Professional home care frequency                                                      | No home care; routine home care; continuous home care                                             |
| Specialist palliative home care service                                               | Yes; no                                                                                           |
| Volunteer hospice service                                                             | Available for a few hours; available 24/7                                                         |
| <i>Health care policy-related variables</i>                                           | <i>Health care policy-related states of variables</i>                                             |
| Federal health care policy                                                            | Home care partially covered; fully covered                                                        |
| Health insurance                                                                      | Home care costs partially covered; fully covered                                                  |
