# Supplementary material for: Impact on place of death in cancer patients: a causal exploration in southern Switzerland
Source: Springer Nature journal article supplement (doi:10.1186/s12904-020-00664-4), 2020-10-15

Additional file 2: Figure 1. Directed acyclic graph of the causal probabilistic model

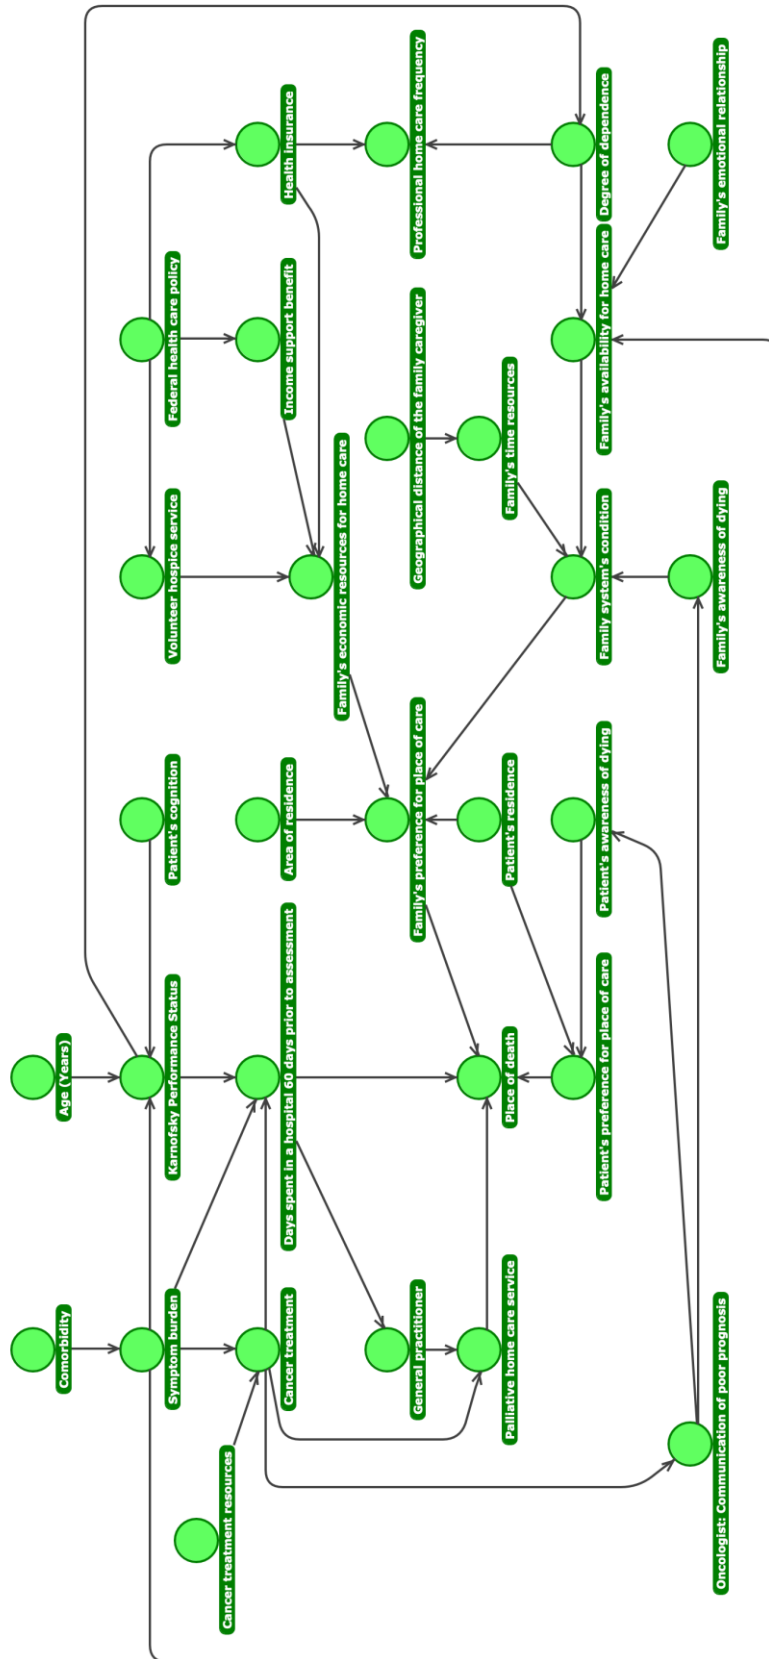

Supplement: MOESM2 [file 18487942]
