# Supplementary material for: Impact on place of death in cancer patients: a causal exploration in southern Switzerland
Source: Springer Nature journal article supplement (doi:10.1186/s12904-020-00664-4), 2020-10-15
Supplement: MOESM4 [file 18487942]

Additional file 4: Table 3. Data collection procedure

| Table 3. Data collection (clinical chart review and review of doctors' and nurses' notes at a median of 38 days prior to death) |                                                        |                                                                                                                                                                                                                                                                                                                                                                |
|---------------------------------------------------------------------------------------------------------------------------------|--------------------------------------------------------|----------------------------------------------------------------------------------------------------------------------------------------------------------------------------------------------------------------------------------------------------------------------------------------------------------------------------------------------------------------|
| Patient's awareness of dying*                                                                                                   | 0 closed<br>1 open<br>? not assessed                   | Closed: Patient avoided talking and/or asking questions about the prognosis or future perspectives<br>Open: Patient talked frankly about the poor prognosis or used metaphors indicating an adequate understanding of the situation                                                                                                                            |
| Patient's preference for the place of care at the end of life                                                                   | 0 Hospital<br>1 Home<br>2 Nursing home<br>? Unknown    | Did the patient talk about preferences with the care team?                                                                                                                                                                                                                                                                                                     |
| Treatment                                                                                                                       | 0 Treatment discontinued<br>1 Ongoing active treatment |                                                                                                                                                                                                                                                                                                                                                                |
| Symptom burden                                                                                                                  | 0 None or low<br>1 Medium<br>2 Severe                  | Visual analogue scale [VAS] 0-10 for symptoms such as pain, breathlessness, delirium, nausea, vomiting, constipation<br>None-low = VAS 0-2<br>Medium = VAS 2-6<br>High = VAS 6-10<br><br>High for unstable clinical conditions: life-threatening infections, bleeding, bowel obstruction, epileptic attacks, relevant neurological sequelae, organ dysfunction |
| Karnofsky Performance Status **                                                                                                 | Number                                                 | * See table                                                                                                                                                                                                                                                                                                                                                    |
| Family's awareness of dying*                                                                                                    | 0 closed<br>1 open<br>? not assessed                   | Closed: family caregivers avoided talking and/or asking questions about the patient's prognosis or future perspectives<br>Open: talked frankly about the patient's poor prognosis or used metaphors indicating an adequate understanding of the situation                                                                                                      |
| Family system's condition for home care                                                                                         | 0 unsuitable condition<br>1 suitable condition         | Unsuitable: No family caregiver available for home care or limited capacity for caregiving, not open to home visits and advice from home care services<br>Suitable: at least one caregiver available, good caregiving attitude, open to home visits and advice from professionals                                                                              |
| Family's preference for the place of care at the end of life                                                                    | 0 Hospital<br>1 Home<br>2 Nursing home<br>? unknown    | Did one of the primary family caregivers talk about preferences with anyone on the care team?                                                                                                                                                                                                                                                                  |
| Care team's prediction of the place of death                                                                                    | 0 Hospital<br>1 Home<br>2 Nursing home                 | Did the care team think the patient would die at home, in a hospital or in a nursing home?                                                                                                                                                                                                                                                                     |

\* Adapted from the awareness of dying theory (Glaser and Strauss, 1965)

\*\* Karnofsky Performance Status. European Society for Medical Oncology [ESMO]

- 100 Normal, no complaints
- 90 Able to carry on normal activity, minor signs or symptoms of disease
- 80 Normal activity with effort
- 70 Cares for self. Unable to carry on normal activity or to do active work
- 60 Requires occasional assistance, but able to care for most of his or her needs
- 50 Requires considerable assistance and frequent medical care
- 40 Disabled, requires special care and assistance
- 30 Severely disabled, hospitalisation is indicated although death non imminent
- 20 Very sick, hospitalisation necessary, active supportive treatment necessary
- 10 Moribund
- 0 Dead
